# Supplementary material
Source: MDPI journal article supplement (https://www.mdpi.com/2071-1050/13/15/8121)
Supplement: s1 [file s1 › sustainability-1281124-supplementary.pdf]

# Survey Questionnaire: Project Management Effect on Quality of Construction Projects

\*\*PM: Project Manager

\*Required

## Introduction

This questionnaire is part of a PhD research study. The following questions are formulated to investigate if different PM qualifications are associated with different skills/abilities/attitudes and consequently their impacts on Quality are different.

Please indicate your level of qualification by selecting one of the options below. \*

- PM with professional & academic qualifications.  
(PMP, CAPM, IPMA, PRINCE2, etc.) and (BSc, BEng, BArch, MArch, MSc, MEng, PhD, etc.)
- PM with only professional qualification.  
(PMP, CAPM, IPMA, PRINCE2, etc.)
- PM with only academic qualification.  
(BSc, BEng, BArch, MArch, MSc, MEng, PhD, etc.)
- PM with no qualification

Please indicate your current location by selecting one of the options below. \*

- Oman
- Bahrain
- Kuwait
- Saudi Arabia
- UAE
- Qatar

Keeping the below mentioned topic areas with their respective skills/abilities/attitude in mind, how do you think you, as a project manager (PM) score from the following aspects?

Please answer the following 15 questions by selecting a number from a scale of 1 to 5.

1. Marketing Orientation (3 Questions) *(Skills to connect human interface with machines & new technologies)*
  - 1.1. Do you usually make a systematic, planned effort to identify, anticipate and satisfy customer demands, client requirements? \*
  - 1.2. Have you ever studied any marketing related subject or had any marketing related experience? \*
  - 1.3. How familiar are you with related new technology such as Virtual Reality (VR), Augmented Reality (AR), Artificial Intelligence (AI) or similar? \*
2. Receptivity towards Digitalization (3 Questions) *(Skills to connect human interface with machines & new technologies)*
  - 2.1. Aiming to finish meetings in half the time. Asking how to complete a task in one month rather than six. \*
  - 2.2. Favor a culture of try, fail fast, learn, and move on. Favor quick-and-dirty work-arounds over purpose-built solutions. \*
  - 2.3. How familiar are you with the new, emerging construction trends and digital technologies? \*
3. "Open Innovation" (3 Questions) *(Skills and activities that machines can't do)*
  - 3.1. Do you think that innovation is important for an organization to be successful? \*
  - 3.2. Do you think that trust, collaboration, common language and a communication strategy between organizations is important for success? \*
  - 3.3. Do you feel comfortable/confident to work in a decentralized network type relationship of companies? \*
4. Complexity (3 Questions) *(Skills and activities that machines can't do)*
  - 4.1. Do you believe that cross disciplinary management, when different disciplines or organizational cultures are managed together is beneficial for an organization? \*
  - 4.2. Do you or could you see yourself as a driving force in a cross disciplinary management collaboration? \*
  - 4.3. Are you usually good at establishing and enhancing work relationships and trust between people and companies? \*
5. "Talentism" (3 Questions) *(Skills and activities that machines can't do)*
  - 5.1. Do you believe that human capital needs nurturing and development via trainings, events, CPD programs etc.? \*
  - 5.2. Do you believe that creativity is important for success? \*
  - 5.3. Do you believe that human /social interaction, empathy and soft skills is important for success? \*
